# Supplementary material for: Circulating monocyte chemoattractant protein‐1 (MCP‐1) is associated with cachexia in treatment‐naïve pancreatic cancer patients
Source: PubMed Central journal article supplement — J Cachexia Sarcopenia Muscle. 2018 Jan 7;9(2):358–68. doi: 10.1002/jcsm.12251 (PMC5879958; doi:10.1002/jcsm.12251), 2018-01-07
Supplement: JCSM-9-358-s001.pdf [file JCSM-9-358-s001.pdf]

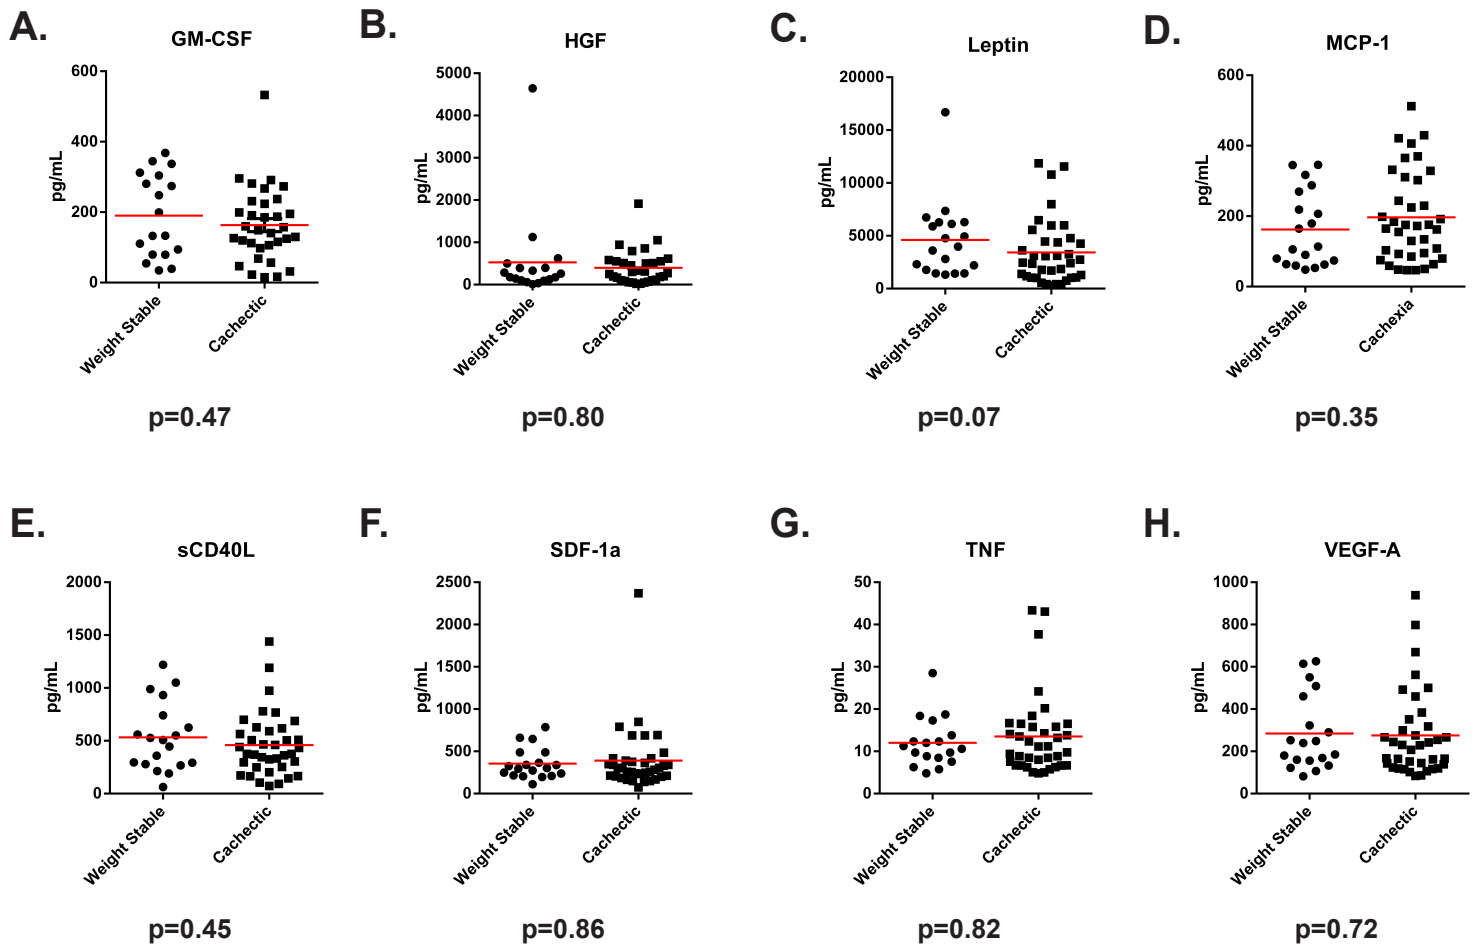

**Figure S1. Soluble Factors Analyzed as Continuous Variables in Resected Patients.** Differences between weight stable and cachectic patients were assessed using a Student's t-test on log-transformed values to eliminate skew. N=56 patients with resected pancreatic cancer. Solid line indicates mean. \* indicates  $p < 0.05$

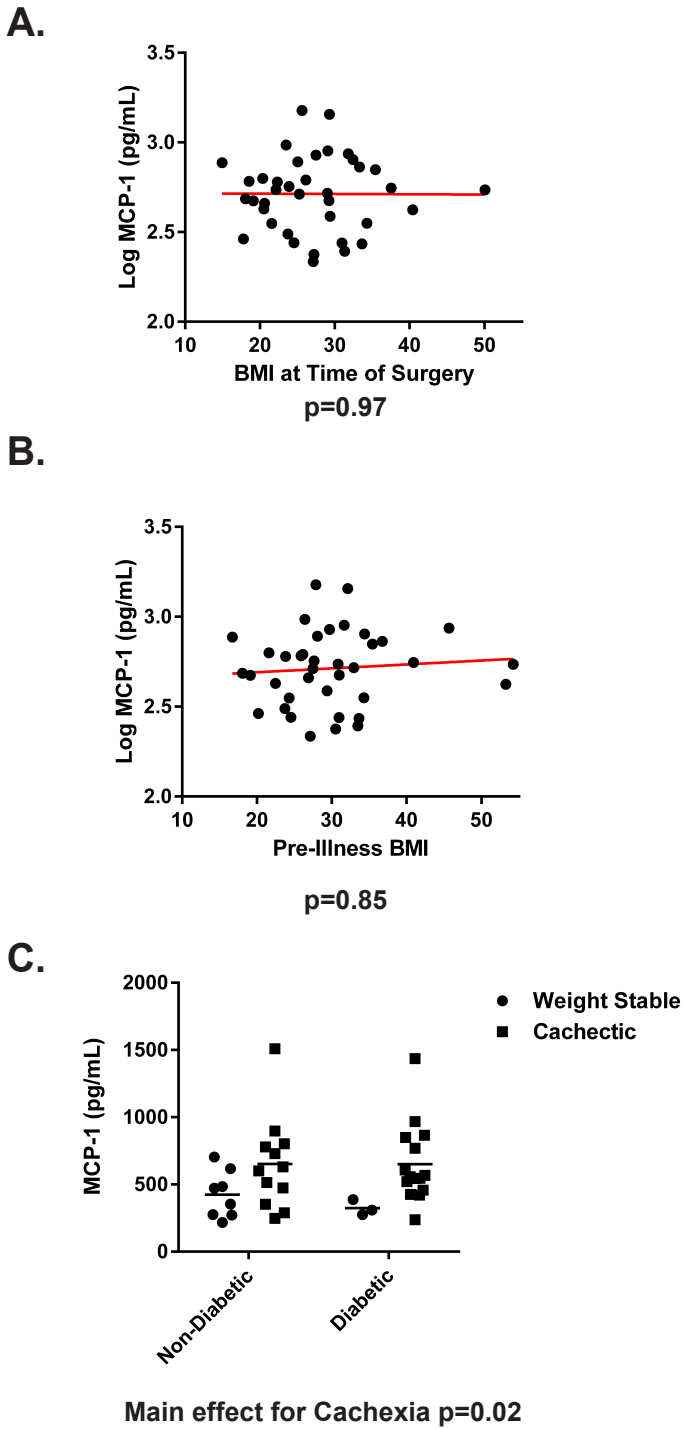

**Figure S2. Additional Information Pertaining to MCP-1 as a Biomarker for Pancreatic Cancer-induced Cachexia.** MCP-1 levels measured by ELISA do not associate with (A) BMI at the time of surgery or (B) pre-illness BMI. (C) Diabetes does not have an effect on the elevation of MCP-1 in cachectic pancreatic cancer patients. N=38 successfully resected, treatment-naive patients. Solid line indicates mean.

**Supplementary Table 1. Complete Table of Analyzed Soluble Factors**

| <b>Soluble Factor</b> | <b>LLOQ (pg/mL)</b> | <b>% Above LLOQ</b> | <b>% Above Lowest Standard</b> |
|-----------------------|---------------------|---------------------|--------------------------------|
| IFN- $\gamma$         | 11                  | 0.00                |                                |
| M-CSF                 | 28                  | 0.00                |                                |
| PDGF-BB               | 7.57                | 5.71                |                                |
| IL-4                  | 11                  | 7.14                |                                |
| IL-1 $\beta$          | 2.09                | 8.57                |                                |
| IL-17A                | 2.27                | 10.00               |                                |
| IL-6                  | 11                  | 10.00               |                                |
| LIF                   | 5.35                | 11.43               |                                |
| G-CSF                 | 7.76                | 14.29               |                                |
| RANKL                 | 14                  | 14.29               |                                |
| IL-15                 | 4.79                | 15.71               |                                |
| TGF $\alpha$          | 4.1                 | 20.00               |                                |
| IL-10                 | 2.49                | 22.86               |                                |
| <hr/>                 |                     |                     |                                |
| IL-8                  | 2.71                | 30.00               | 30.00                          |
| FGF-2                 | 3.03                | 38.57               | 55.71                          |
| MMP-13                | 4.93                | 34.29               | 65.71                          |
| TRAIL                 | 8.57                | 61.43               | 71.43                          |
| <hr/>                 |                     |                     |                                |
| TNF                   | 6.98                | 28.57               | 78.57                          |
| GM-CSF                | 18                  | 65.71               | 85.71                          |
| HGF                   | 8.79                | 84.29               | 90.00                          |
| CD40L                 | 40                  | 28.57               | 98.57                          |
| Leptin                | 44                  | 100.00              | 100                            |
| MCP-1                 | 1.29                | 100.00              | 100                            |
| SDF-1 $\alpha$        | 18                  | 100.00              | 100                            |
| VEGF-A                | 5.62                | 100.00              | 100                            |

**Supplementary Table 2. Soluble Factors Analyzed as Categorical Variables (Resected Patients)**

| <b>Proportion of Patients Reaching Lowest Standard (%)</b> |                      |                  |                            |
|------------------------------------------------------------|----------------------|------------------|----------------------------|
| <b>Soluble Factor</b>                                      | <b>Weight Stable</b> | <b>Cachectic</b> | <b>Fisher's Exact Test</b> |
| TRAIL                                                      | 17/19 (89)           | 26/37 (70)       | p=0.18                     |
| MMP-13                                                     | 11/19 (58)           | 27/37 (73)       | p=0.54                     |
| FGF-2                                                      | 10/19 (53)           | 26/37 (70)       | p=0.54                     |
| IL-8                                                       | 4/19 (21)            | 14/37 (38)       | p=0.24                     |

**Supplementary Table 3. Soluble Factors in Resected Chemotherapy Naïve Patients**

| <b>Soluble Factor</b> | <b>Mean Plasma Concentration +/- SEM</b> |                  | <b>Student's t-test</b> |
|-----------------------|------------------------------------------|------------------|-------------------------|
|                       | <b>Weight Stable</b>                     | <b>Cachectic</b> |                         |
| HGF                   | 746.3 ± 447.1                            | 456.0 ± 89.30    | p=0.45                  |
| sCD40L                | 605.0 ± 103.9                            | 503.4 ± 61.65    | p=0.35                  |
| SDF-1 $\alpha$        | 388.0 ± 65.19                            | 384.4 ± 82.39    | p=0.51                  |
| TNF                   | 11.55 ± 1.148                            | 13.41 ± 1.915    | p=0.97                  |
| VEGF-A                | 356.7 ± 59.49                            | 289.3 ± 42.37    | p=0.25                  |

---

| <b>Proportion of Patients Reaching Lowest Standard (%)</b> |                      |                  |                            |
|------------------------------------------------------------|----------------------|------------------|----------------------------|
| <b>Soluble Factor</b>                                      | <b>Weight Stable</b> | <b>Cachectic</b> | <b>Fisher's Exact Test</b> |
| TRAIL                                                      | 9/11 (82)            | 19/27 (70)       | p=0.69                     |
| MMP-13                                                     | 6/11 (55)            | 19/27 (70)       | p=0.46                     |
| FGF-2                                                      | 7/11 (64)            | 19/27 (70)       | p=0.71                     |
| IL-8                                                       | 4/11 (36)            | 12/27 (44)       | p=0.73                     |

**Supplementary Table 4. High-sensitivity Bioplex In Resected, Chemotherapy-naïve patients  
Mean Plasma Concentration +/- SEM**

| <b>Soluble Factor</b> | <b>LLOQ (pg/mL)</b> | <b>Weight Stable</b> | <b>Cachectic</b> | <b>Student's t-test</b> |
|-----------------------|---------------------|----------------------|------------------|-------------------------|
| IL-4                  | 4.4                 | 15.68 ± 8.881        | 7.826 ± 1.599    | p=0.56                  |
| IL-6                  | 1                   | 11.78 ± 8.565        | 26.28 ± 11.45    | p=0.36                  |
| IL-10                 | 0.2                 | 2.580 ± 0.9599       | 5.837 ± 2.226    | p=0.18                  |
| TNF                   | 2.7                 | 3.377 ± 1.293        | 2.833 ± 0.5346   | p=0.92                  |

**Proportion of Patients Reaching Lowest Standard (%)**

| <b>Soluble Factor</b> | <b>LLOQ (pg/mL)</b> | <b>Weight Stable</b> | <b>Cachectic</b> | <b>Fisher's Exact Test</b> |
|-----------------------|---------------------|----------------------|------------------|----------------------------|
| IL-1β                 | 0.2                 | 3/11 (27)            | 12/27 (44)       | p=0.47                     |
| IL-2                  | 0.4                 | 6/11 (55)            | 15/27 (56)       | p=1.00                     |
| IL-12p70              | 2.6                 | 4/11 (36)            | 13/27 (48)       | p=0.72                     |
| IL-17α                | 0.9                 | 6/11 (55)            | 16/27 (59)       | p=1.00                     |
| IFN-γ                 | 1                   | 2/11 (18)            | 10/27 (37)       | p=0.44                     |
